# Supplementary material
Source: PubMed Central journal article supplement (PMC2818901)
Supplement: 0913610107_pnas.200913610SI.pdf [file 0913610107_pnas.200913610SI.pdf]

# Supporting Information

Huising et al. 10.1073/pnas.0913610107

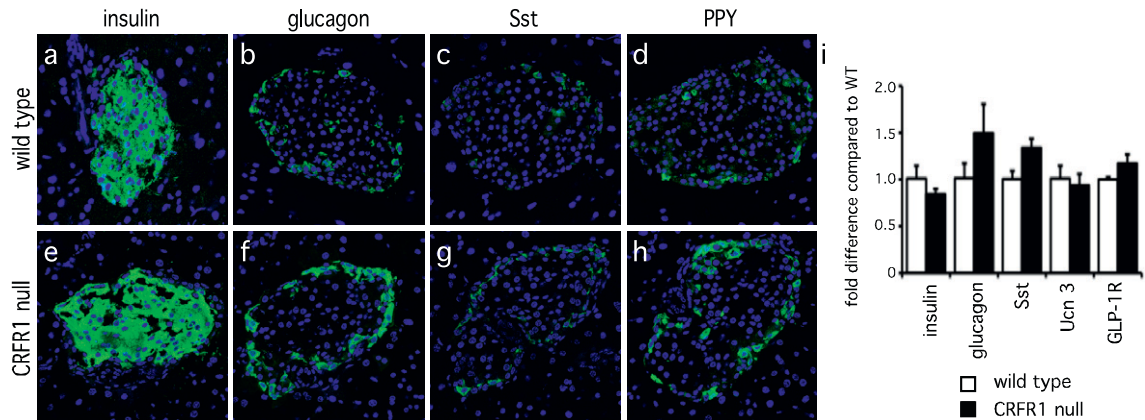

**Fig. S1.** Constitutive absence of CRFR1 does not affect islet architecture. The overall morphology of islets stained for insulin, glucagon, Sst, and polypeptide Y (PPY) did not differ markedly between wild-type (A–D) and CRFR1 (E–H) pancreata, although the number of  $\alpha$  cells may be modestly increased in CRFR1-null animals (F). This finding is confirmed by the expression profile of isolated pancreatic islets from wild-type and CRFR1-null animals, which reveal no significant differences in the expression levels for insulin, glucagon, somatostatin, Ucn 3, or GLP-1R but confirm a trend toward elevated expression of glucagon (I).

**Table S1. Names and sequences of primers**

| Gene     | Primer name   | Sequence (5'→3')       |
|----------|---------------|------------------------|
| HPRT     | qmHPRT.fwu    | ttctcctcagaccgctttt    |
|          | qmHPRT.rvu    | cctggttcacatcgctaattc  |
| CRFR1    | qrodCRFR1.fwu | cttctcctctggggctga     |
|          | qrodCRFR1.rvu | agggtccaatgaggtccac    |
| GLP-1R   | qmGLP-1R.fwu1 | ccctgggccagtagtggtg    |
|          | qmGLP-1R.rvu1 | gcaggctggagttgtcctta   |
| GIPR     | qmGIPR.fwu1   | gggatcttgagagaccaca    |
|          | qmGIPR.rvu1   | cccacggtatacatgatctgc  |
| insulin  | qrodINS2.fw1  | gctctctacgtggtgtggg    |
|          | qrodINS2.rv1  | caaggctgaaggtcacctgc   |
| glucagon | qrodGLUC.fw1  | tcacagggcacattcaccag   |
|          | qrodGLUC.rv1  | catcatgacgtttggcaatgtt |
| Sst      | qrodSst.fw1   | ctgtgtcaccggcgctg      |
|          | qrodSst.rv1   | ctgtgtcaccggcgctc      |
| cFos     | qmcFos.fwu1   | cagcctttcctactaccattcc |
|          | qmcFos.rvu1   | acagatctgcgcaaaagtc    |
| NR4A2    | qmNR4A2.fwu1  | tcagagcccacgtcgatt     |
|          | qmNR4A2.rvu1  | tagtcagggtttgcctggaa   |
| RGS2     | qmRGS2.fwu1   | agaaaatgaagcggacactctt |
|          | qmRGS2.rvu1   | ttgccagttttgggcttc     |
| DUSP1    | qmDUSP1.fwu1  | gtgcctgacagtgcagaatc   |
|          | qmDUSP1.rvu1  | cactgccagggtacaggaag   |
| Ucn 3    | qrodU3.fw1    | gctgtgccctcgacct       |
|          | qrodU3.rv1    | tgggcatcagcctgcct      |
